# Supplementary material
Source: Royal Society of Chemistry journal article supplement (doi:10.1039/d6ta01272h)
Supplement: d6ta01272h1.pdf [file d6ta01272h1.pdf]

## Supporting Information

# Self-supported layered heterostructure derived from recycling waste silk for high performance low-temperature sodium storage

Zhiwen Long<sup>a</sup>, Hao Jia<sup>a,\*</sup>, Ruizhe Zhang<sup>a</sup>, Wei Li<sup>a</sup>, Keliang Wang<sup>b,\*</sup>, Hui Qiao<sup>a,\*</sup>

<sup>a</sup> Key Laboratory of Special Protective Textiles, Ministry of Education, College of Textile Science and Engineering, Jiangnan University, Wuxi 214122, China

<sup>b</sup> Institute of Future Technology, Southwest Jiaotong University, Chengdu, Sichuan 610031, China

---

\* Corresponding author. Tel/Fax: +86-510-8591-2009

E-mail: [huiqiao@jiangnan.edu.cn](mailto:huiqiao@jiangnan.edu.cn) (H. Qiao), [jiahao@jiangnan.edu.cn](mailto:jiahao@jiangnan.edu.cn) (H. Jia),

[klwang@swjtu.edu.cn](mailto:klwang@swjtu.edu.cn) (K. Wang)

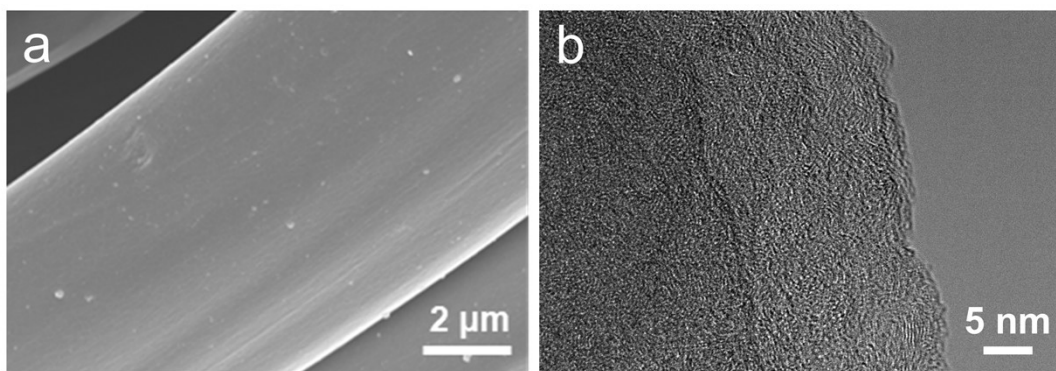

**Fig. S1.** (a) SEM and (b) TEM images of CST

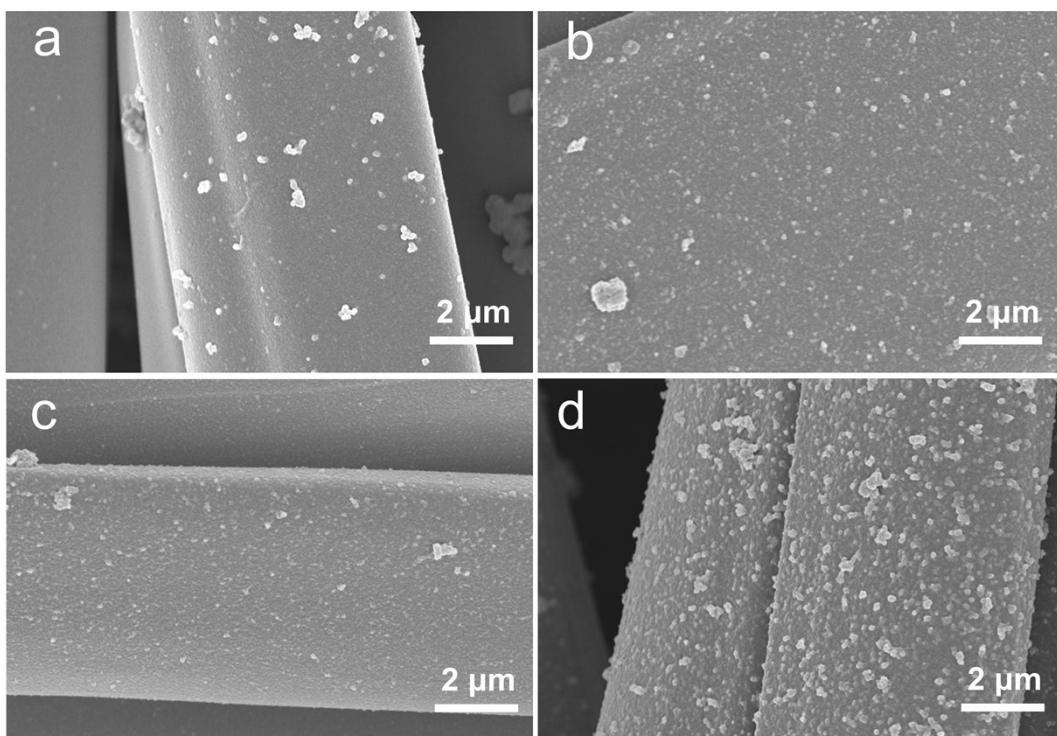

**Fig. S2.** SEM images of (a) O<sub>2</sub>-assisted PDA coating on CST, (b) Cu<sup>2+</sup>-assisted PDA coating on CST, (c) in-situ growth Sn-Fe-MOF on CST, (d) seed-mediated growth Sn-Fe-MOF on CST

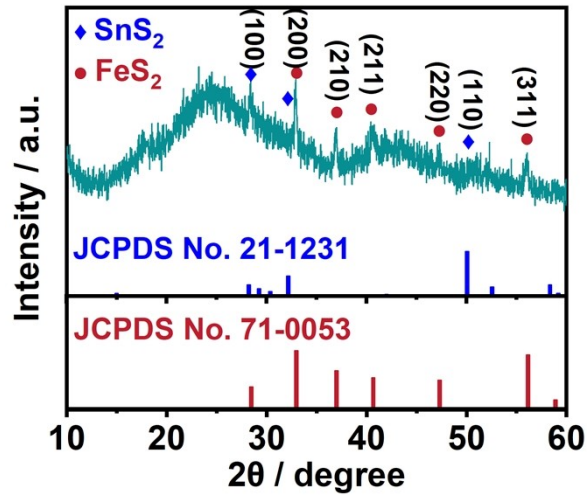

Fig. S3. XRD pattern of SFS/CST

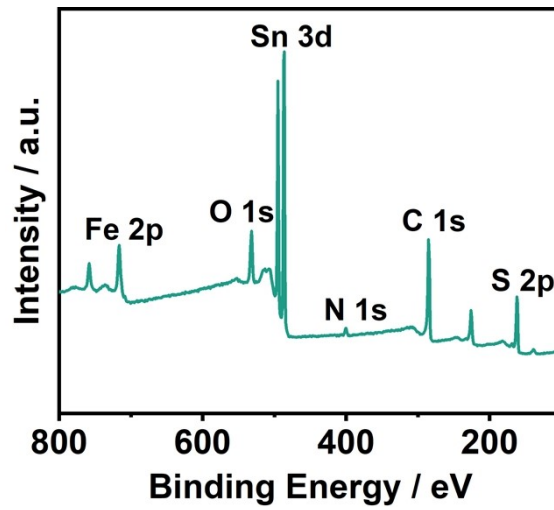

Fig. S4. XPS spectra of GO-SFS/CST

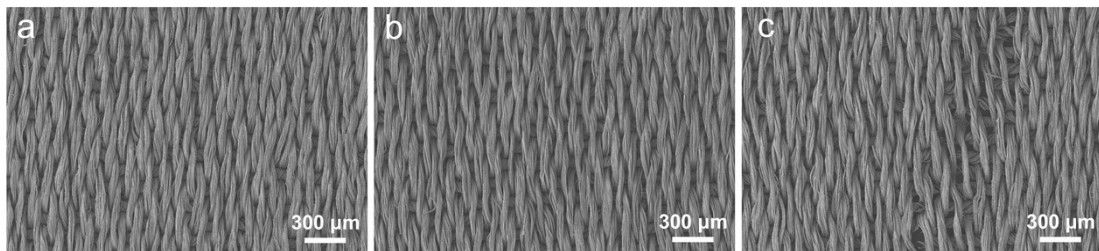

Fig. S5. SEM images of GO-SFS/CST (a) before bending cycles, (b) after 500

bending cycles, (c) after 1500 bending cycles

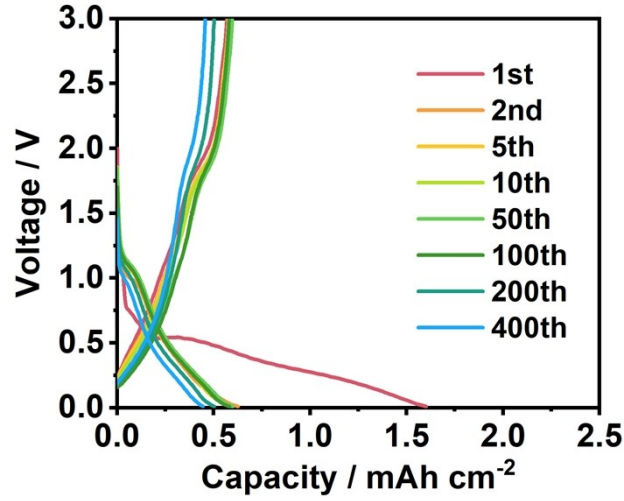

Fig. S6. GCD curves of SFS/CST TCEs

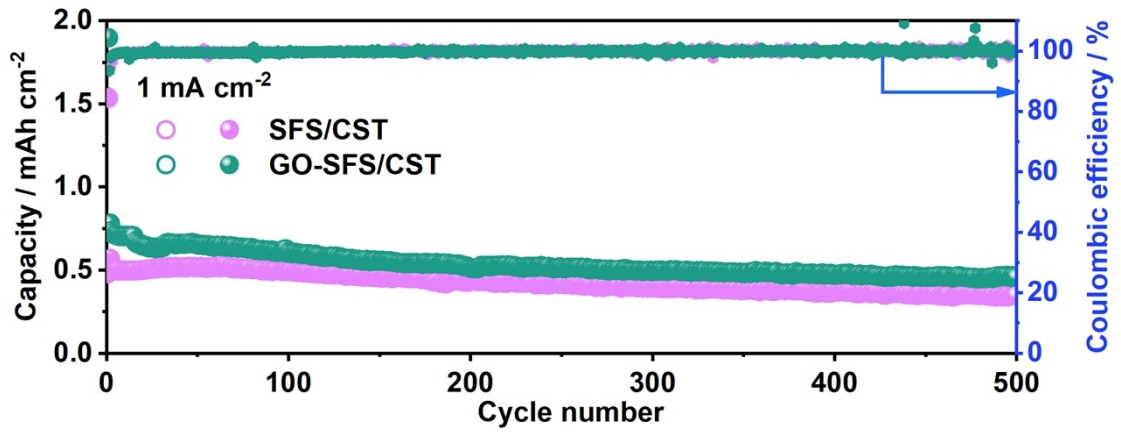

Fig. S7. The cycling performance of GO-SFS/CST TCEs and SFS/CST TCEs at current density of 1.0 mA cm<sup>-2</sup>.

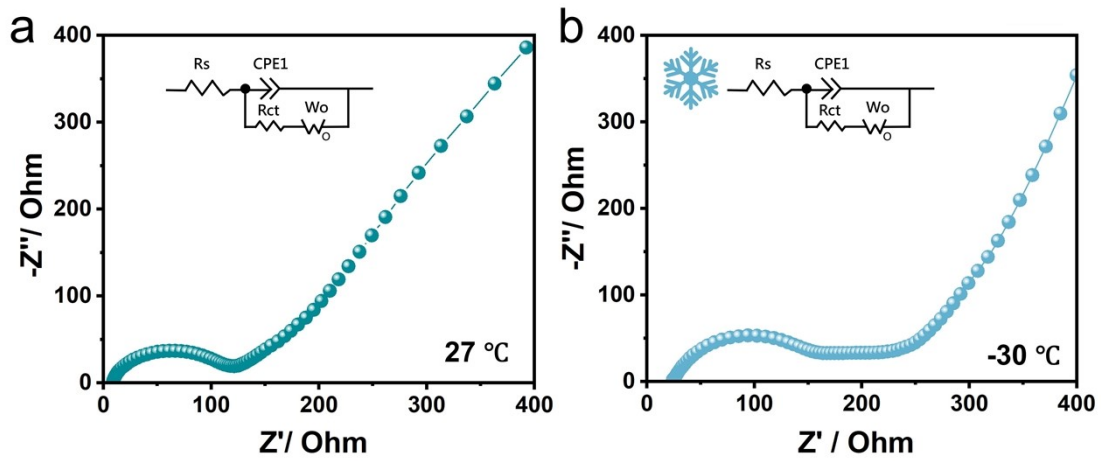

**Fig. S8.** The EIS results of GO-SFS/CST TCEs at 27 and -30 °C after 2 cycles

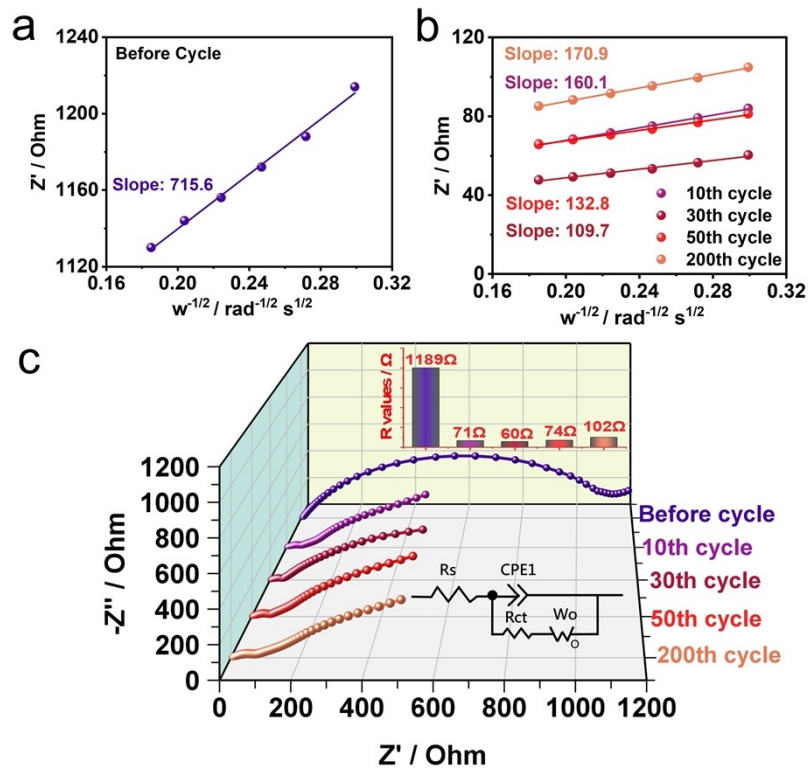

**Fig. S9.** (a) The relationship between  $Z'$  and  $\omega^{-1/2}$  and (b) relationship between  $Z'$  and  $\omega^{-1/2}$  under different cycle numbers of SFS/CST; (c) The EIS results of SFS/CST

TCEs before cycles, after 10 cycles, 30 cycles, 50 cycles and 200 cycles.

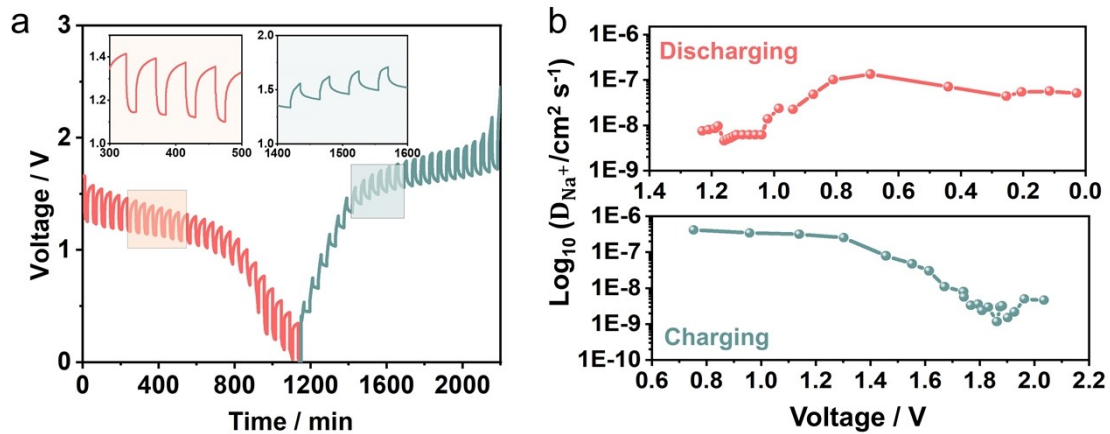

**Fig. S10.** (a) GITT potential profiles and (b) the Na<sup>+</sup> diffusion coefficient in charge and discharge of GO-SFS/CST TCEs.

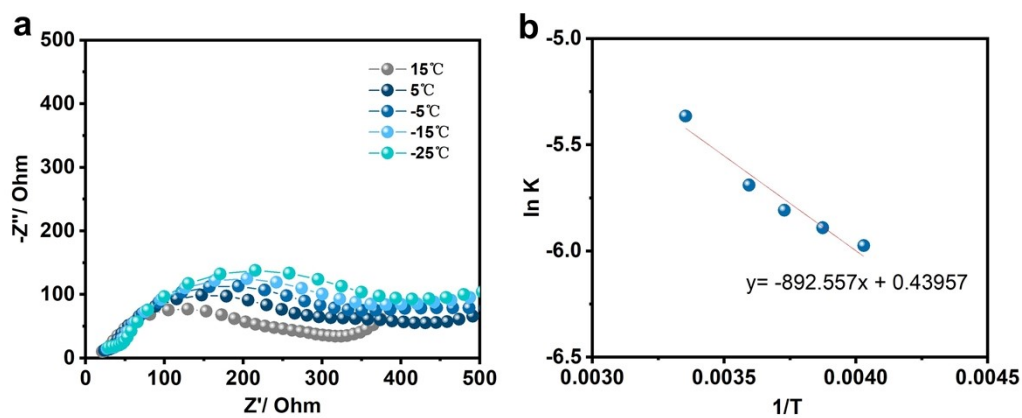

**Fig. S11.** (a) Nyquist plots of GO-SFS/CST at different temperatures ranging from 15 to -25°C, (b) Arrhenius plot showing the linear relationship between  $\ln(1/R_{ct})$  and  $1/T$ .

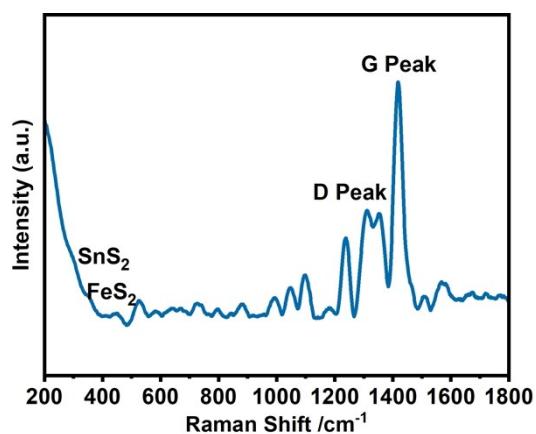

**Fig. S12.** Raman of GO-SFS/CST after 1000 cycles.

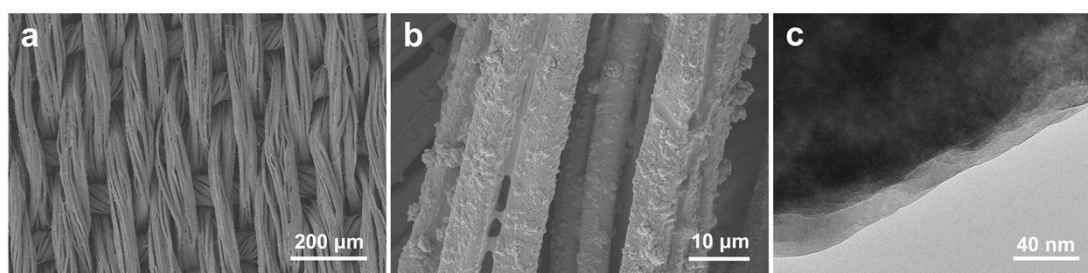

**Fig. S13.** (a, b) SEM and (c) TEM images of GO-SFS/CST TCEs after 500 cycles.

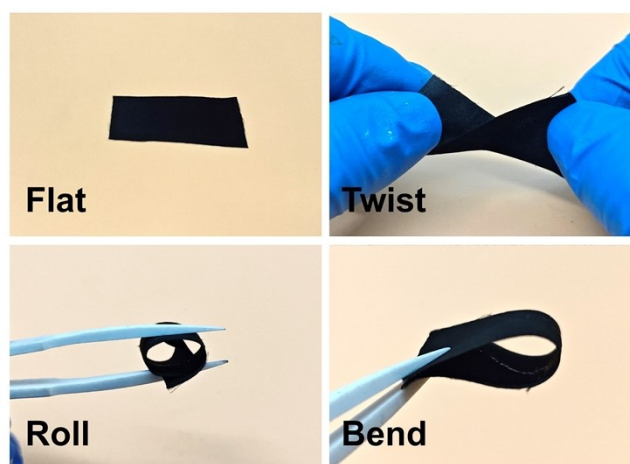

**Fig. S14.** Digital photographs demonstrating the twisting, rolling, and bending deformations of NVP/CST

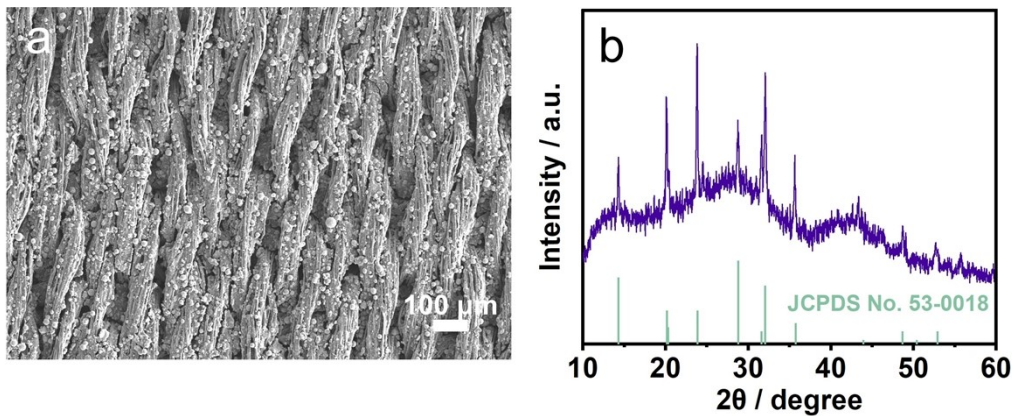

**Fig. S15.** (a) SEM image and (b) XRD pattern of NVP/CST

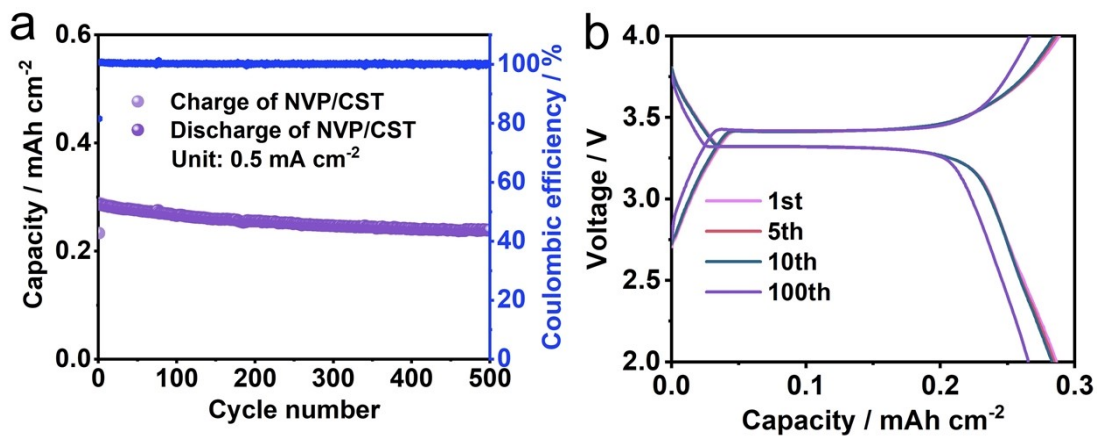

**Fig. S16.** (a) Cycling performance and (b) GCD curves of NVP/CST

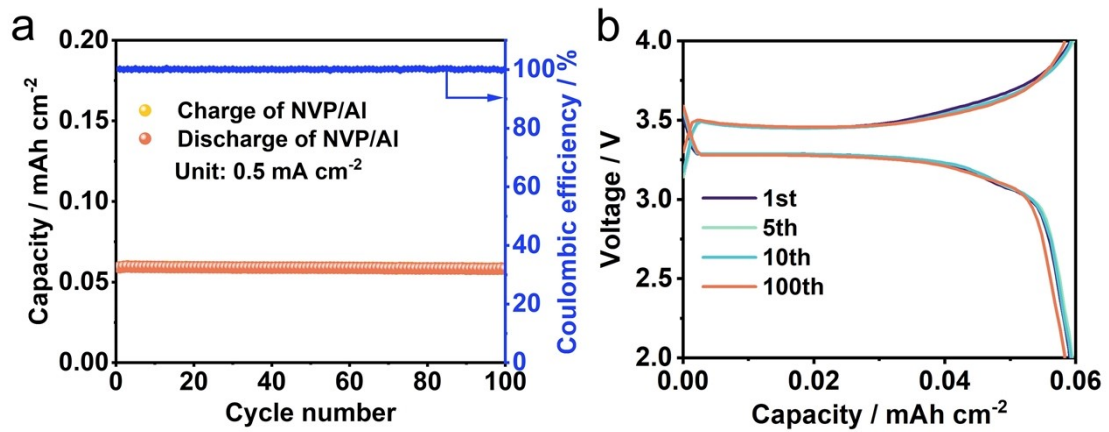

**Fig. S17.** (a) Cycling performance and (b) GCD curves of NVP loaded on the surface of aluminum foil current collectors

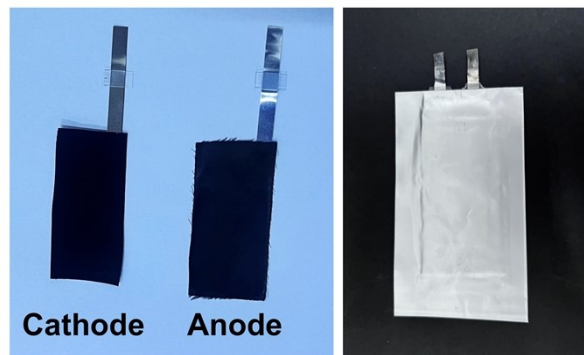

**Fig. S18.** Schematic diagram of the components in a pouch cell battery assembly

**Table S1.** Comparison of electrochemical performance between the GO-SFS/CST and recently reported sulfur-based composite electrodes

| Materials                                               | Current density<br>(A/g) | Capacity<br>(mAh/g) | Cycle Life | Ref              |
|---------------------------------------------------------|--------------------------|---------------------|------------|------------------|
| SnS <sub>2</sub> /FeS <sub>2</sub> /rGO                 | 1 A/g                    | 441.4 mAh/g         | 500        | [1]              |
| SnS <sub>2</sub> /rGO/SnS <sub>2</sub>                  | 0.1 A/g                  | 1133 mAh/g          | 100        | [2]              |
| FeS <sub>2</sub> @C@SnS <sub>2</sub>                    | 585.7 mAh/g              | 1A/g                | 1000       | [3]              |
| C@SnS <sub>2</sub> /SnS@C                               | 502.5 mAh/g              | 2A/g                | 1000       | [4]              |
| Bi <sub>2</sub> S <sub>3</sub> @NC/SnS <sub>2</sub> @NC | 290 mAh/g                | 5A/g                | 1400       | [5]              |
| PDC/SnS <sub>2</sub> @rGO                               | 295.7 mA h/g             | 3A/g                | 100        | [6]              |
| SnS <sub>2</sub> @C/CNF                                 | 478.7 mAh/g              | 2A/g                | 1000       | [7]              |
| GO-SFS/CST                                              | 525 mAh/g                | 4.37 A/g            | 1000       | <b>This work</b> |

Reference

[1] Y. Chen, H. Liu, X. Guo, S. Zhu, Y. Zhao, S. Iikubo, T. Ma, Bimetallic sulfide SnS<sub>2</sub>/FeS<sub>2</sub> nanosheets as high-performance anode materials for sodium-ion batteries, *ACS Appl. Mater. Interfaces* **2021**, *13*, 39248-39256.

- [2] Y. Jiang, D. Song, J. Wu, Z. Wang, S. Huang, Y. Xu, Z. Chen, B. Zhao, J. Zhang, Sandwich-like SnS<sub>2</sub>/Graphene/SnS<sub>2</sub> with expanded interlayer distance as high-rate lithium/sodium-ion battery anode materials, *ACS Nano* **2019**, *13*, 9100-9111.
- [3] W. Zhao, X. Ma, Y. Zheng, L. Yue, C. Xu, G. Wang, Y. Luo, D. Zheng, S. Sun, A. Ali Alshehri, X. Sun, C. Tang, Hierarchical wormlike engineering: Self-assembled SnS<sub>2</sub> nanoflake arrays decorated on hexagonal FeS<sub>2</sub>@C nano-spindles enables stable and fast sodium storage, *Chem. Eng. J.* **2023**, *459*, 141629.
- [4] Y. Tang, F. Wang, C. Nie, H. Dong, Y. Bai, M. Zhao, S. Yang, Rational design of hollow C@SnS<sub>2</sub>/SnS@C cubes with N-doping to realize stepwise sodium storage induced structural stability for highly stable cycling performance, *J. Power Sources* **2024**, *609*, 234695.
- [5] W. Chen, Z. Wang, Z. Huang, W. Xie, J. Zhao, Y. Xiao, S. Lei, B. Huang, B. Cheng, Mixed-dimensional van der Waals heterostructure of Bi<sub>2</sub>S<sub>3</sub> nanorods and SnS<sub>2</sub> nanosheets bridged with N-doped carbon interlayer for enhanced sodium-ion batteries, *Energy Storage Mater.* **2024**, *73*, 103880.
- [6] Y. Sun, Y. L. Yang, X. L. Shi, L. Ye, Y. Hou, J. Wang, G. Suo, S. Lu, Z. G. Chen, An ultra-stable sodium half/full battery based on a unique micro-channel pine-derived carbon/SnS<sub>2</sub>@reduced graphene oxide film, *Battery Energy* **2023**, *2*, 20220046.

[7] Z. Cui, S. A He, J. Zhu, M. Gao, H. Wang, H. Zhang, R. Zou, Tailoring the void space using nanoreactors on carbon fibers to confine SnS<sub>2</sub> nanosheets for ultrastable lithium/sodium-ion batteries, *Small Methods* **2022**, *6*, 2101484.
